# Supplementary material for: Genome-Wide Mapping of Transcriptional Regulation and Metabolism Describes Information-Processing Units in Escherichia coli
Source: PubMed Central journal article supplement (PMC5540944; doi:10.3389/fmicb.2017.01466), 2017-08-03
Supplement: Image_2.pdf [file Image_2.pdf]

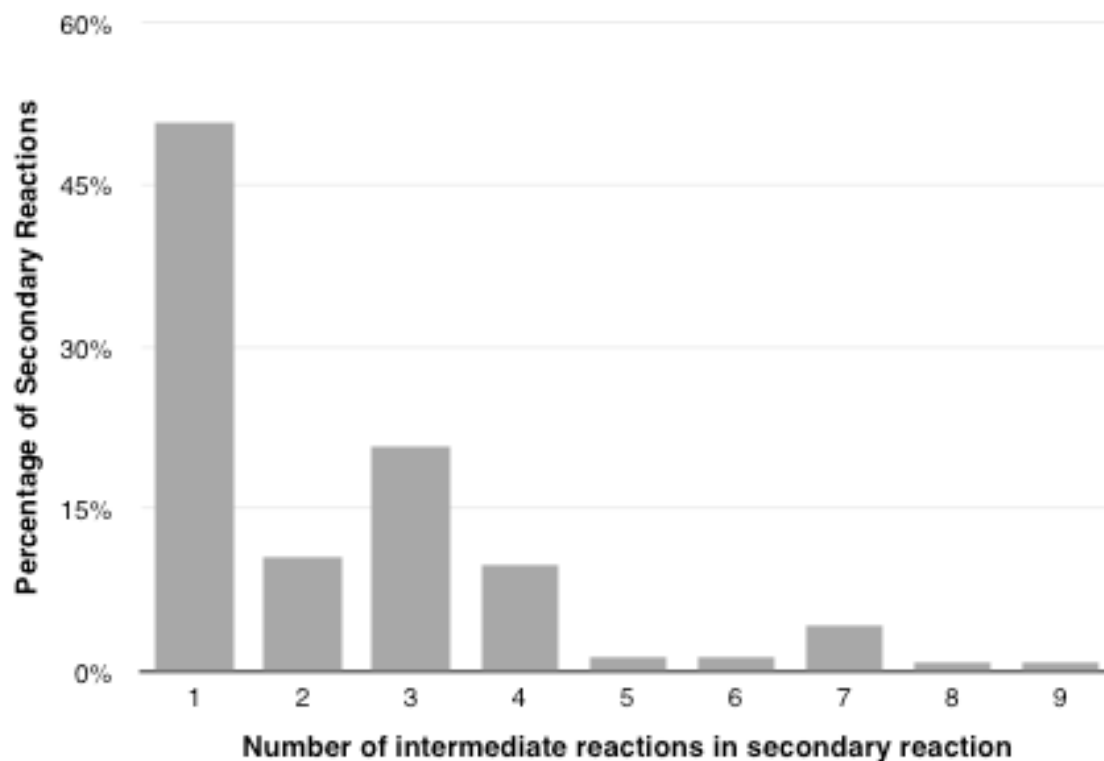

**Figure S2.** Distribution of individual reactions in secondary reactions. As seen in Figure 1C-D, each secondary reaction represents one or more intermediate reactions in a metabolic pathway that connects two metabolites in a GENSOR unit. A total of 144 secondary reactions were added to 48 GENSOR units. The x axis shows the number of intermediate reactions. The y axis shows the percentage of secondary reactions added via x number of intermediate reactions. Almost 50% of secondary reactions included only one intermediate reaction.
