# Supplementary material for: Genome-Wide Mapping of Transcriptional Regulation and Metabolism Describes Information-Processing Units in Escherichia coli
Source: PubMed Central journal article supplement (PMC5540944; doi:10.3389/fmicb.2017.01466), 2017-08-03
Supplement: Image_5.pdf [file Image_5.pdf]

**A**

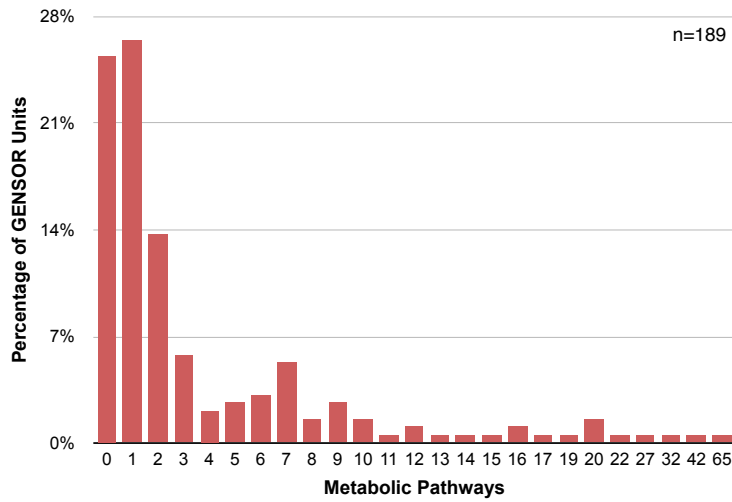

**B**

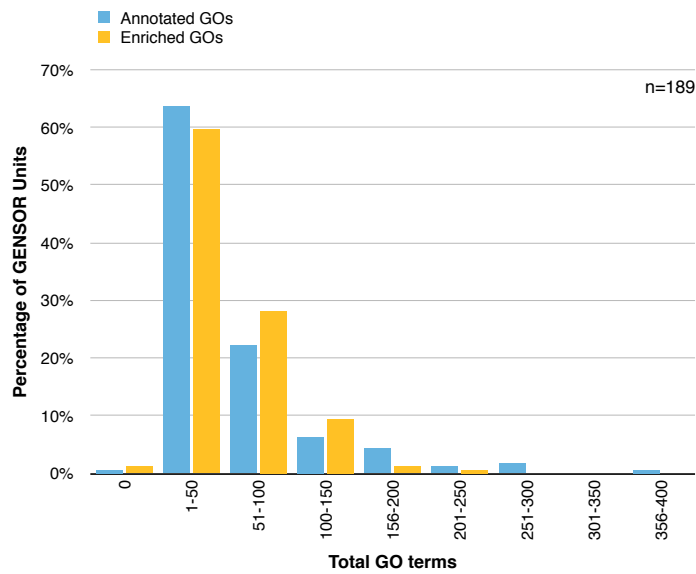

**C**

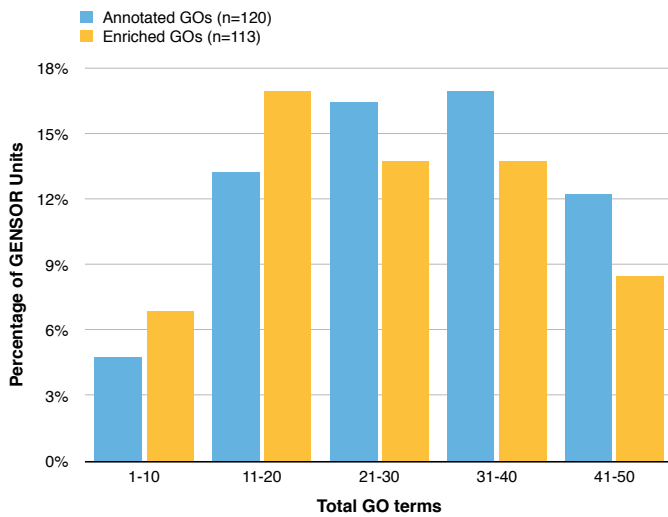

**Figure S5.** Distribution of metabolic pathways and gene ontology terms present in the 189 GENSOR units analyzed. **(A)** Distribution of total metabolic pathways. **(B)** Total GO terms present (blue) and enriched (yellow) in the 189 GENSOR units. **(C)** Distribution of the 1-50 group from panel B. Color coding is the same as that described for panel B.
