# Supplementary material for: Genome-Wide Mapping of Transcriptional Regulation and Metabolism Describes Information-Processing Units in Escherichia coli
Source: PubMed Central journal article supplement (PMC5540944; doi:10.3389/fmicb.2017.01466), 2017-08-03
Supplement: Table_1.pdf [file Table_1.pdf]

| GU name | Effector                            | Effector Position  | GU name | Effector                          | Effector Position  |
|---------|-------------------------------------|--------------------|---------|-----------------------------------|--------------------|
| AlaS    | alanine                             | intermediate       | LsrR    | AI-2                              | intermediate       |
| AllR    | glyoxylate                          | intermediate       | MalT    | MalK                              | intermediate       |
| AllS    | allantoin                           | intermediate       | MalT    | maltotriose                       | intermediate       |
| AlsR    | allose                              | intermediate       | MelR    | melibiose                         | intermediate       |
| AraC    | arabinose                           | intermediate       | MetJ    | SAM                               | intermediate       |
| ArgP    | arginine                            | intermediate       | MetR    | homo-cys                          | intermediate       |
| ArgP    | lysine                              | intermediate       | MhpR    | 2,3-DHP                           | intermediate       |
| ArgR    | arginine                            | intermediate       | MhpR    | 3HPP                              | intermediate       |
| ArsR    | arsenite                            | intermediate       | MntR    | Mn(II)                            | intermediate       |
| AsnC    | asparagine                          | intermediate       | ModE    | molybdate                         | intermediate       |
| BetI    | choline                             | intermediate       | MqsA    | MqsR                              | intermediate       |
| ChbR    | N-monoacetylchitobiose 6'-phosphate | intermediate       | MurR    | MurNAc-6-P                        | intermediate       |
| Cra     | fructose 1,6-biphosphate            | intermediate       | NanR    | N-acetylneuraminate               | intermediate       |
| Cra     | fructose 1-phosphate                | intermediate       | NhaR    | Sodium                            | intermediate       |
| CueR    | Cu(I)                               | intermediate       | NikR    | nickel                            | intermediate       |
| CynR    | cyanate                             | intermediate       | NrdR    | dATP                              | intermediate       |
| CysB    | acetylserine                        | intermediate       | PdhR    | pyruvate                          | intermediate       |
| CysB    | sulfide                             | intermediate       | PrpR    | (2S,3S)-2-methylcitrate           | intermediate       |
| CysB    | thiosulfate                         | intermediate       | RcnR    | cobalt ion                        | intermediate       |
| CytR    | cytidine                            | intermediate       | RcnR    | nickel                            | intermediate       |
| DeoR    | 2-deoxy-D-ribose 5-phosphate        | intermediate       | RelB    | RelE                              | intermediate       |
| DhaR    | DhaK                                | intermediate       | RhaS    | rhamnose                          | intermediate       |
| DsdC    | serine                              | intermediate       | RutR    | thymine                           | intermediate       |
| FhlA    | formate                             | intermediate       | RutR    | uracil                            | intermediate       |
| FucR    | fuculose-1-P                        | intermediate       | TreR    | alpha,alpha-trehalose 6-phosphate | intermediate       |
| Fur     | Fe+2                                | intermediate       | TreR    | trehalose                         | substrate /product |
| Fur     | Mn(II)                              | intermediate       | TrpR    | tryptophan                        | intermediate       |
| GalR    | galactose                           | intermediate       | TyrR    | phenylalanine                     | intermediate       |
| GalS    | galactose                           | intermediate       | TyrR    | tryptophan                        | intermediate       |
| GcvA    | glycine                             | intermediate       | TyrR    | tyrosine                          | intermediate       |
| GlcC    | glycolate                           | intermediate       | UxuR    | fructuronate                      | intermediate       |
| GlpR    | glycerol-3-phosphate                | intermediate       | XapR    | xanthosine                        | intermediate       |
| GntR    | gluconate                           | intermediate       | XylR    | xylose                            | intermediate       |
| GutR    | gulitol                             | substrate /product | YqjI    | Fe+2                              | intermediate       |
| HipB    | HipA                                | intermediate       | ZntR    | Zinc                              | intermediate       |
| IclR    | glyoxylate                          | intermediate       | Zur     | Zinc                              | intermediate       |
| IdnR    | 5-ketogluconate                     | intermediate       |         |                                   |                    |
| IdnR    | idonate                             | intermediate       |         |                                   |                    |
| IlvY    | alpha-acetolactate                  | intermediate       |         |                                   |                    |
| LacI    | allolactose                         | intermediate       |         |                                   |                    |
| LldR    | lactate                             | intermediate       |         |                                   |                    |

**Table S1.** Position of effectors with feedback in the regulated pathway of their GENSOR Units.
